# Supplementary material for: Feeding strategies for the acquisition of high‐quality food sources in stream macroinvertebrates: Collecting, integrating, and mixed feeding
Source: PubMed Central journal article supplement (PMC6283091; doi:10.1002/lno.10818), 2018-05-06

Fig A1 Periphyton EPA% variations across sites and seasons

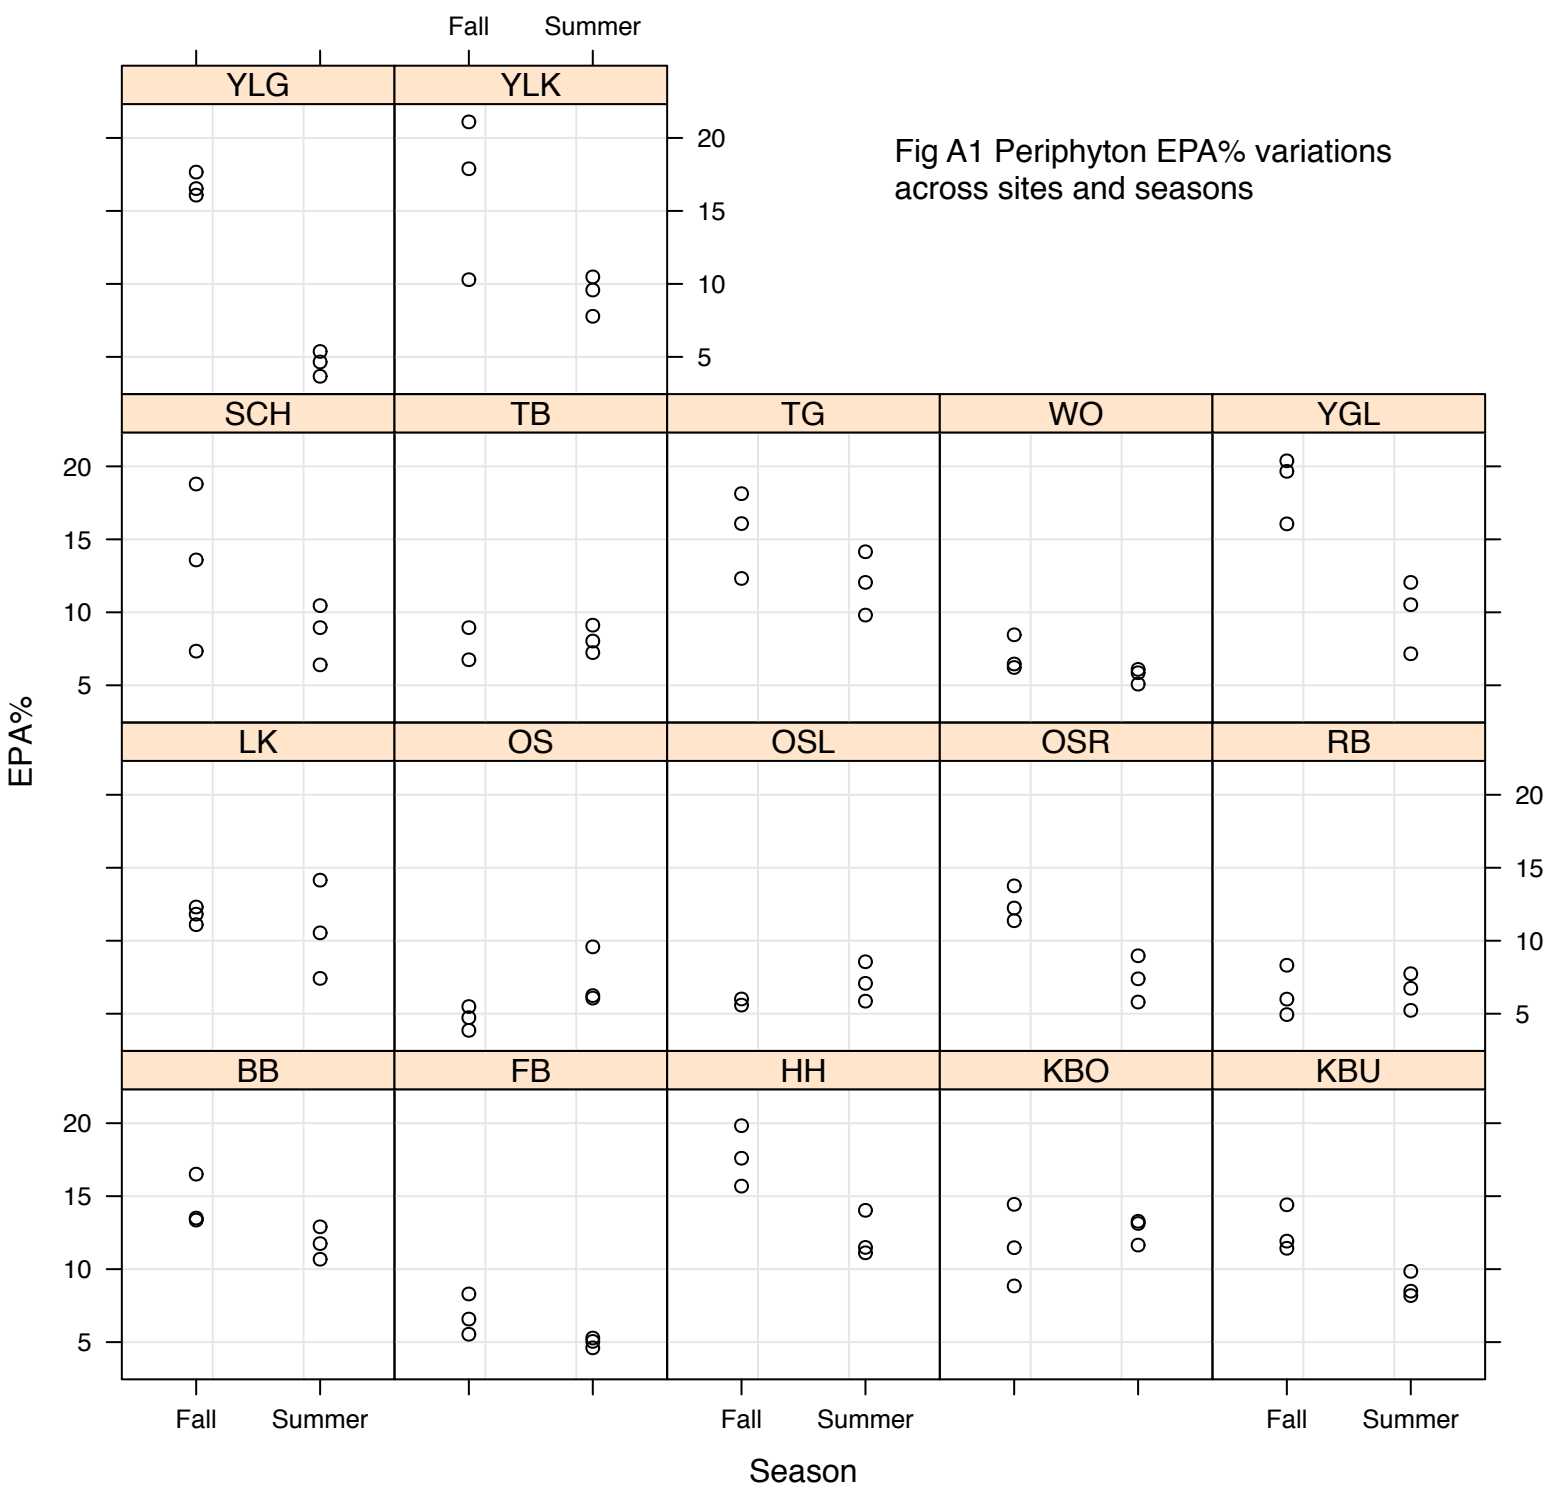

Fig A2 Grazer EPA% variations across sites and seasons

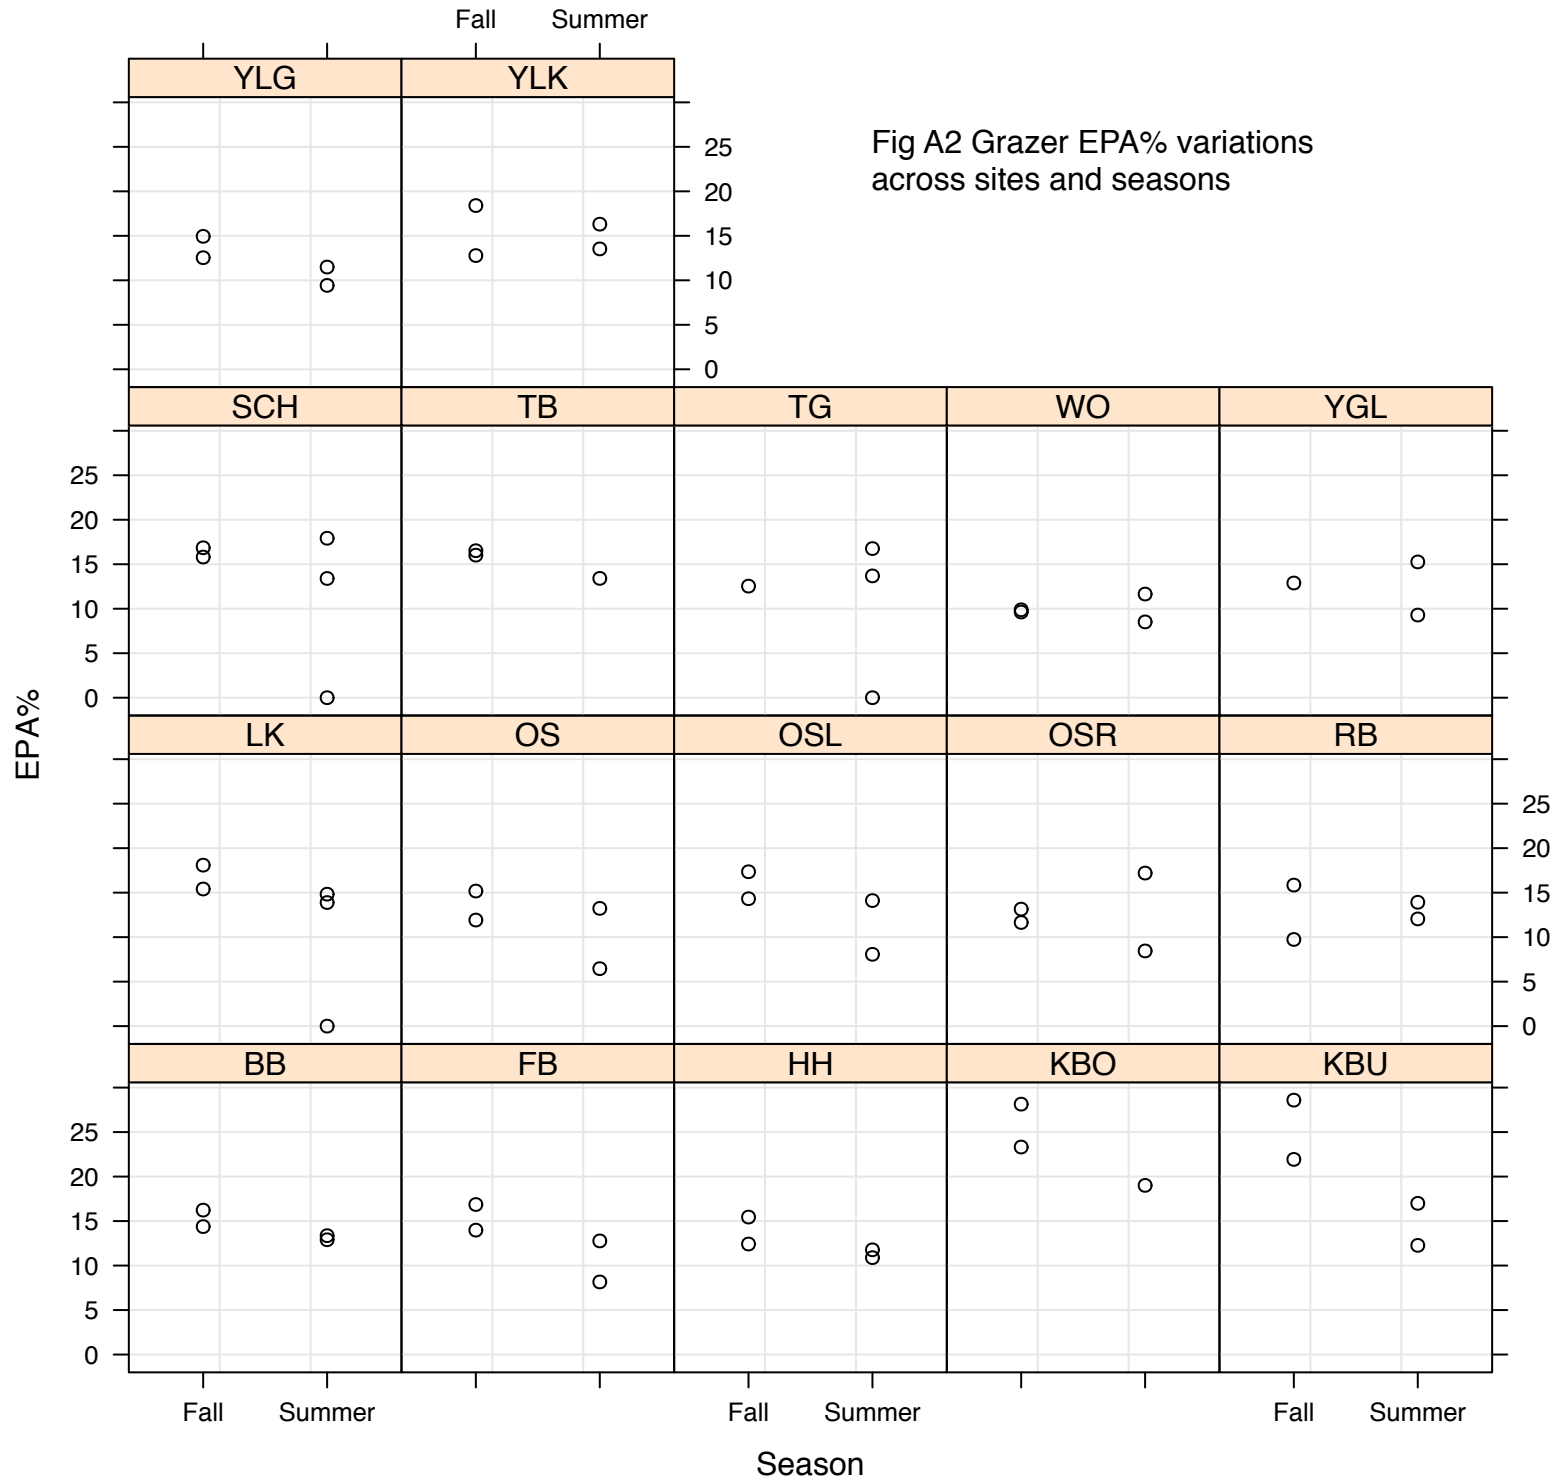

Fall Summer

Fig A3 Shredder EPA% variations across sites and seasons

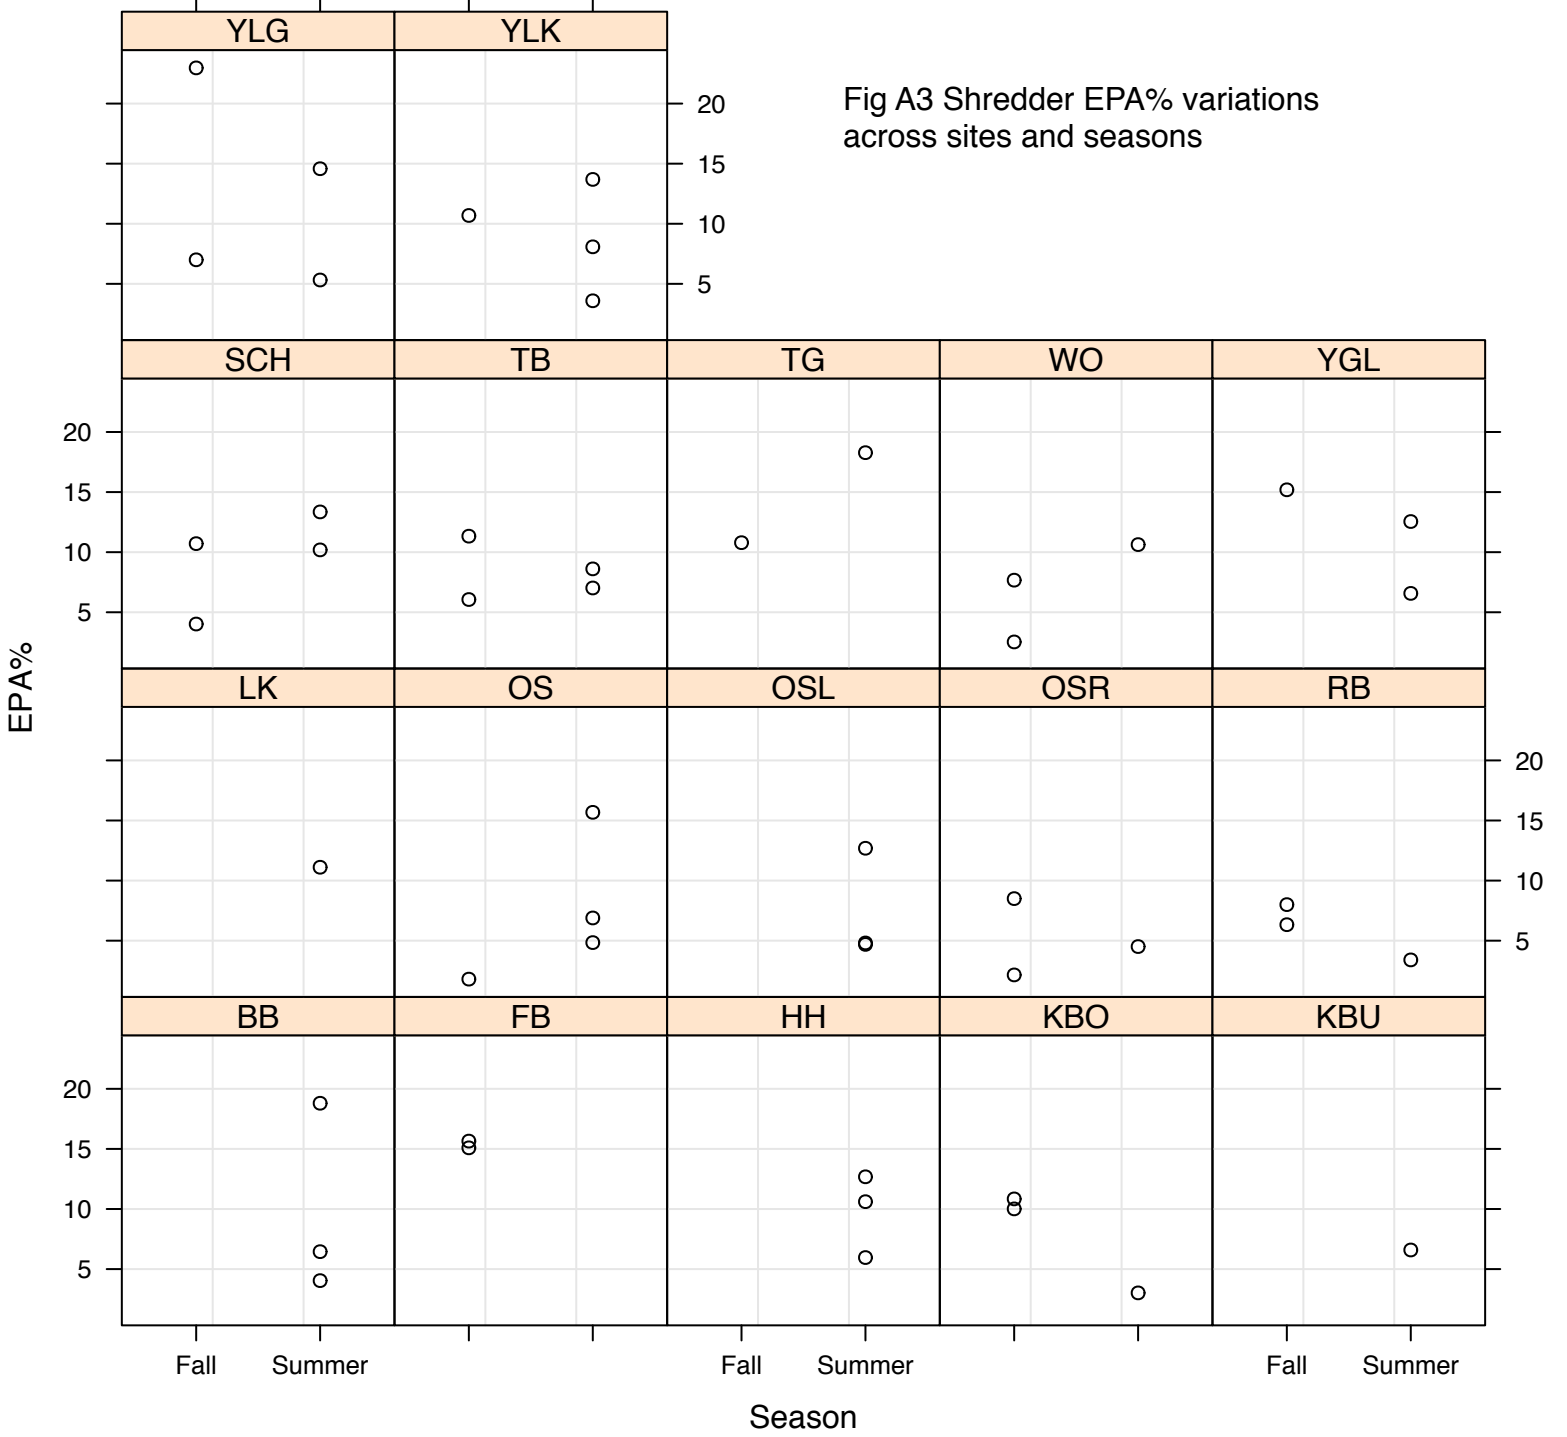

Supplement: LNO-63-1964-s002.pdf [file LNO-63-1964-s002.pdf]
